# Supplementary material for: Selective magnetic mercury(ii) ion capturing ligand-doped silica gel for water analysis
Source: Royal Society of Chemistry journal article supplement (doi:10.1039/c8an02362j), 2019-01-01
Supplement: c8an02362j1.pdf [file c8an02362j1.pdf]

## Electronic Supplementary Information

### Selective magnetic mercury (II) ion capturing ligand-doped silica gel for water analysis

Soo Wei Khor,<sup>a</sup> Yean Kee Lee<sup>a</sup> and Kheng Soo Tay<sup>\*a</sup>

<sup>a</sup>Department of Chemistry, Faculty of Science, University of Malaya, 50603 Kuala Lumpur, Malaysia.

\*E-mail: khengsoo@um.edu.my

**Table S1** Elemental composition of SiO<sub>2</sub>@MNP and ODE@SiO<sub>2</sub>@MNP (determined after exposed to Hg<sup>2+</sup> solution).

| Element          | Percent (%)           |                           |
|------------------|-----------------------|---------------------------|
|                  | SiO <sub>2</sub> @MNP | ODE@SiO <sub>2</sub> @MNP |
| Iron (Fe)        | 23.9                  | 9.7                       |
| Oxygen (O)       | 43.3                  | 37.6                      |
| Silica (Si)      | 32.8                  | 13.0                      |
| Carbon (C)       | -                     | 11.1                      |
| Nitrogen (N)     | -                     | 1.8                       |
| Sulfur (S)       | -                     | 1.5                       |
| Hg <sup>2+</sup> | Not detected          | 25.3                      |

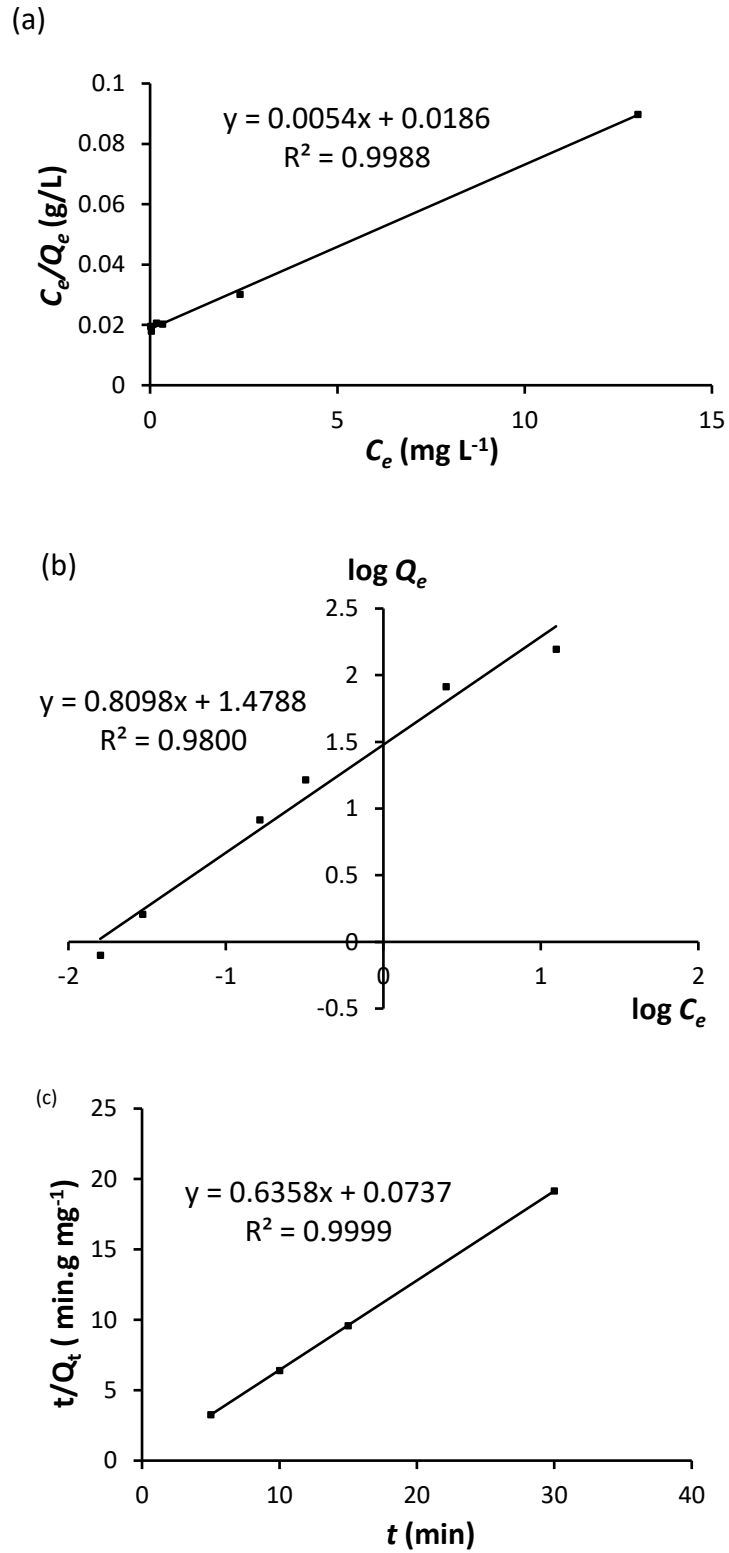

**Fig. S1** (a) Langmuir's isotherm plot, (b) Freundlich adsorption isotherm plot, (c) Pseudo-second order model plot
